# Supplementary material for: Differential expression of neurogenes among breast cancer subtypes identifies high risk patients
Source: PubMed Central journal article supplement (PMC4868688; doi:10.18632/oncotarget.6543), 2015-12-10
Supplement: oncotarget-07-5313-s001.pdf [file oncotarget-07-5313-s001.pdf]

## SUPPLEMENTARY TABLES

**Supplementary Table S1:** A list of 2688 neurogens has been obtained using 3 searchable, integrated databases of human genes (GeneGo ([www.portal.genego.com](http://www.portal.genego.com)), GeneCards ([www.genecards.org](http://www.genecards.org)), and Eugenes ([www.eugenes.org](http://www.eugenes.org))). The omics information of the genes, including Refseq, Protein ID, Transc\_Refseq, Unigene Cluster, Entre Gene Cyto Band, and Aliases & Descriptions, were integrated and managed by TransGP software (<http://bioinformatics.idibaps.org/anntools/transgp.php>)

**Supplementary Table S2:** A final list of 1266 neurogens obtained from DATABASE1 after filtering according to the biological relevance of each gene

**Supplementary Table S3:** A list of 364 neurogenes differentially expressed in CD24+ cells (221 neurogenes underexpressed; 143 neurogenes overexpressed)

**Supplementary Table S4:** A list of 266 neurogenes differentially expressed in CD44+ cells (168 neurogenes underexpressed; 98 neurogenes overexpressed)

**Supplementary Table S5:** Using an arbitrary fold change cutoff of  $> \pm 3$ , 63 neurogenes are differentially expressed in CD44+ cancer cells compared to CD44+ normal breast epithelium cells (21 neurogenes  $>+3$  in red; 42 neurogenes  $>-3$  in green) and 102 neurogenes are differentially expressed in CD24+ cancer cells compared to CD24+ normal breast epithelium cells (36 neurogenes  $>+3$  in red; 66 neurogenes  $>-3$  in green). FC: Fold Change; FDR: False Discovery Rate
